# Supplementary material for: Pro-inflammatory proteins S100A9 and tumor necrosis factor-α suppress erythropoietin elaboration in myelodysplastic syndromes
Source: PubMed Central journal article supplement — Haematologica. 2017 Oct 5;102(12):2015–20. doi: 10.3324/haematol.2016.158857 (PMC5709100; doi:10.3324/haematol.2016.158857), 2017-12
Supplement: 2016.158857.CLUZEAU_SUPPL.pdf [file 2016.158857.CLUZEAU_SUPPL.pdf]

## Pro-inflammatory proteins S100A9 and tumor necrosis factor- $\alpha$ suppress erythropoietin elaboration in myelodysplastic syndromes

Thomas Cluzeau,<sup>1,2,3</sup> Kathy L. McGraw,<sup>1</sup> Brittany Irvine,<sup>1</sup> Erico Masala,<sup>4</sup> Lionel Ades,<sup>3,5</sup> Ashley A. Basiorka,<sup>6</sup> Jaroslaw Maciejewski,<sup>7</sup> Patrick Auburger,<sup>2</sup> Sheng Wei,<sup>1</sup> Pierre Fenaux,<sup>3,5</sup> Valeria Santini<sup>4</sup> and Alan List<sup>1</sup>

<sup>1</sup>H. Lee Moffitt Cancer Center and Research Institute, Tampa, FL, USA; <sup>2</sup>Cote d'Azur University, INSERM U1065, Centre Méditerranéen de Médecine Moléculaire, Nice, France; <sup>3</sup>Groupe Français des Myélodysplasies, Paris, France; <sup>4</sup>Hematology Unit, AOU Careggi, Firenze, Italy; <sup>5</sup>Senior Hematology Unit, Saint Louis Hospital, Paris, France; <sup>6</sup>H. Lee Moffitt Cancer Center and Research Institute and the Cancer Biology Ph.D. Program, University of South Florida, Tampa, FL, USA and <sup>7</sup>Cleveland Clinic, Taussig Cancer Institute, Cleveland, OH, USA

©2017 Ferrata Storti Foundation. This is an open-access paper. doi:10.3324/haematol.2016.158857

Received: October 24, 2016.

Accepted: September 28, 2017.

Pre-published: October 5, 2017.

Correspondence: cluzeau.t@chu-nice.fr

---

## **Supplemental figures legends**

**Supplemental figure 1 : Relationship between inflammatory protein and Epo concentrations in patient serum.**

(A) Correlations between Epo and S100A9, (B) Correlations between Epo and TNF $\alpha$ ,  
(C) Correlations between TNF $\alpha$  and S100A9. All data are represented on scatter plots.

A.

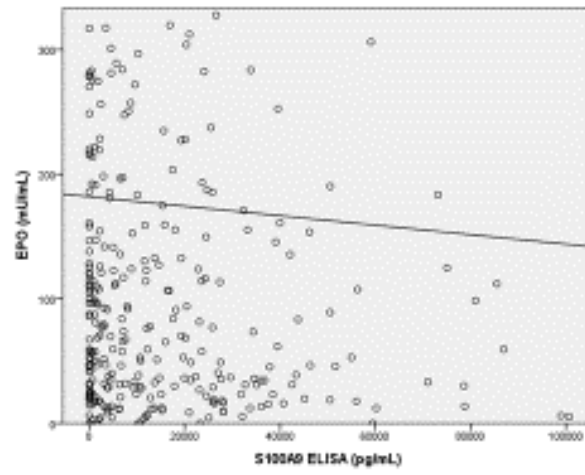

B.

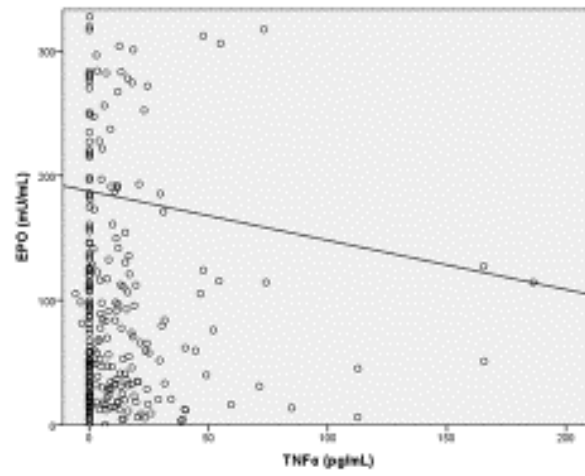

C.

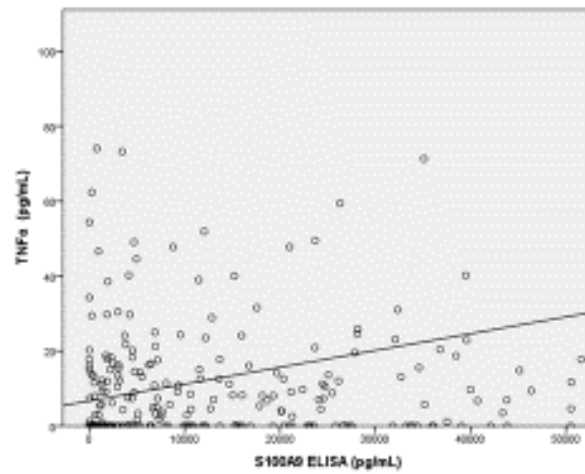

Supplemental Figure 1. Cluzeau et al.
