# Supplementary material for: Pro-inflammatory proteins S100A9 and tumor necrosis factor-α suppress erythropoietin elaboration in myelodysplastic syndromes
Source: PubMed Central journal article supplement — Haematologica. 2017 Oct 5;102(12):2015–20. doi: 10.3324/haematol.2016.158857 (PMC5709100; doi:10.3324/haematol.2016.158857), 2017-12
Supplement: 2016_158857-Disclosures_and_Contributions.pdf [file 2016_158857-Disclosures_and_Contributions.pdf]

Haematologica  
HAEMATOL/2016/158857  
Version 3

Pro-inflammatory proteins S100A9 and TNF $\alpha$ ; suppress  
erythropoietin elaboration in myelodysplastic syndromes

Thomas Cluzeau, Kathy L. McGraw, Brittany Irvine, Erico Masala,  
Lionel Ades, Ashley A Basiorka, Jaroslaw P. Maciejewski, Patrick  
Auberger, Sheng Wei, Pierre Fenaux, Valeria Santini, and Alan List

Disclosures: The authors have nothing to disclose

Contributions: TC, KLM, BI, AAB performed research. TC, KLM, BI, EM, LA, AAB, JM, PA,  
SW, PF, VS and AL edited the manuscript. TC, KLM and AL designed research, collected,  
analyzed data and wrote the manuscript.
